# Supplementary material
Source: publisher figshare collection journal article supplement (https://karger.figshare.com/articles/dataset/_/4047513)
Supplement: Supplementary file 1 [file 1]

# SUPPLEMENTAL FILES

## The prognostic value of CT angiography and CT perfusion in acute ischemic stroke

Tom van Seeters, MD,<sup>1</sup> Geert Jan Biessels, MD, PhD,<sup>2</sup> L Jaap Kappelle, MD, PhD,<sup>2</sup> Irene C van der Schaaf, MD, PhD,<sup>1</sup> Jan Willem Dankbaar, MD, PhD,<sup>1</sup> Alexander D Horsch, MD, MRCS,<sup>1</sup> Joris M Niesten, MD, PhD,<sup>1</sup> Merel J Luitse, MD,<sup>1</sup> Charles B Majoie, MD, PhD,<sup>3</sup> Jan Albert Vos, MD, PhD,<sup>4</sup> Wouter J Schonewille, MD,<sup>5</sup> Marianne A van Walderveen, MD, PhD,<sup>6</sup> Marieke J Wermer, MD, PhD,<sup>7</sup> Lucien E Duijm, MD, PhD,<sup>8</sup> Koos Keizer, MD, PhD,<sup>9</sup> Joseph C Bot, MD, PhD,<sup>10</sup> Marieke C Visser, MD, PhD,<sup>11</sup> Aad van der Lugt, MD, PhD,<sup>12</sup> Diederik W Dippel, MD PhD,<sup>13</sup> F Oskar Kesselring, MD,<sup>14</sup> Jeannette Hofmeijer, MD, PhD,<sup>15</sup> Geert J Lycklama à Nijeholt, MD, PhD,<sup>16</sup> Jelis Boiten, MD, PhD,<sup>17</sup> Willem Jan van Rooij, MD, PhD,<sup>18</sup> Paul L de Kort, MD, PhD,<sup>19</sup> Yvo B Roos, MD, PhD,<sup>20</sup> Ewoud J van Dijk, MD, PhD,<sup>21</sup> C Constantijn Pleiter, MD,<sup>22</sup> Willem P Mali, MD, PhD,<sup>1</sup> Yolanda van der Graaf, MD, PhD,<sup>23</sup> Birgitta K Velthuis, MD, PhD,<sup>1</sup> on behalf of the Dutch acute stroke study (DUST) investigators

1. Department of Radiology, University Medical Center Utrecht, Utrecht, The Netherlands;
2. Department of Neurology, Brain Center Rudolf Magnus, University Medical Center Utrecht, Utrecht, The Netherlands;
3. Department of Radiology, Academic Medical Center, Amsterdam, The Netherlands;
4. Department of Radiology, St. Antonius Hospital, Nieuwegein, The Netherlands;
5. Department of Neurology, St. Antonius Hospital, Nieuwegein, The Netherlands;
6. Department of Radiology, Leiden University Medical Center, Leiden, The Netherlands;
7. Department of Neurology, Leiden University Medical Center, Leiden, The Netherlands;
8. Department of Radiology, Catharina Hospital, Eindhoven, The Netherlands;
9. Department of Neurology, Catharina Hospital, Eindhoven, The Netherlands;
10. Department of Radiology, VU University Medical Center, Amsterdam, The Netherlands;
11. Department of Neurology, VU University Medical Center, Amsterdam, The Netherlands;
12. Department of Radiology, Erasmus MC University Medical Center, Rotterdam, The Netherlands;
13. Department of Neurology, Erasmus MC University Medical Center, Rotterdam, The Netherlands;
14. Department of Radiology, Rijnstate Hospital, Arnhem, The Netherlands;
15. Department of Neurology, Rijnstate Hospital, Arnhem, The Netherlands;
16. Department of Radiology, Medical Center Haaglanden, The Hague, The Netherlands;
17. Department of Neurology, Medical Center Haaglanden, The Hague, The Netherlands;
18. Department of Radiology, St. Elisabeth Hospital, Tilburg, The Netherlands;
19. Department of Neurology, St. Elisabeth Hospital, Tilburg, The Netherlands;
20. Department of Neurology, Academic Medical Center, Amsterdam, The Netherlands;
21. Department of Neurology, Radboud University Medical Center, Nijmegen, The Netherlands;
22. Department of Radiology, St. Franciscus Hospital, Rotterdam, The Netherlands;
23. Julius Center for Health Sciences and Primary Care, University Medical Center Utrecht, Utrecht, The Netherlands

**Supplemental Table 1.** Univariable analyses between patient characteristics and non-contrast CT measures and poor clinical outcome, within derivation set (n=824)

| Predictor                                                        | OR (95% CI)            | PPV |
|------------------------------------------------------------------|------------------------|-----|
| <b>Patient characteristics</b>                                   |                        |     |
| Age (per decade)                                                 | 1.42 (1.27-1.59)***    |     |
| Lowest tertile (<63.0 years)                                     |                        | 26% |
| Middle tertile (63.0-75.1 years)                                 |                        | 31% |
| Highest tertile (≥75.1 years)                                    |                        | 49% |
| Stroke severity (NIHSS)                                          |                        |     |
| NIHSS 1-2                                                        | 1.00 (reference)       | 6%  |
| NIHSS 3-4                                                        | 3.64 (1.67-7.96)**     | 20% |
| NIHSS 5-7                                                        | 6.04 (2.85-12.79)***   | 29% |
| NIHSS 8-13                                                       | 10.14 (4.84-21.23)***  | 41% |
| NIHSS >13                                                        | 34.88 (16.52-73.67)*** | 71% |
| Time from symptom onset to scan (per hour)                       | 1.03 (0.96-1.11)       |     |
| Lowest tertile (≤84 minutes)                                     |                        | 39% |
| Middle tertile (84-142 minutes)                                  |                        | 33% |
| Highest tertile (≥142 minutes)                                   |                        | 34% |
| Pre-admission mRS >2                                             | 10.40 (4.80-22.54)***  | 83% |
| Admission glucose level (per mmol/L)                             | 1.14 (1.07-1.22)***    |     |
| Lowest tertile (≤6.1 mmol/L)                                     |                        | 28% |
| Middle tertile (6.1-7.3 mmol/L)                                  |                        | 36% |
| Highest tertile (≥7.3 mmol/L)                                    |                        | 44% |
| IV-rtPA, intra-arterial thrombolysis, or mechanical thrombectomy | 1.07 (0.79-1.45)       | 36% |
| <b>Non-contrast CT measures</b>                                  |                        |     |
| Hyperdense vessel sign                                           | 3.78 (2.70-5.30)***    | 60% |
| ASPECTS ≤7 <sup>†</sup>                                          | 4.21 (2.62-6.75)***    | 66% |

Abbreviations: OR, odds ratio; CI, confidence interval; PPV, positive predictive value; NIHSS, National Institutes of Health Stroke Scale; mRS, modified Rankin Scale; IV-rtPA, intravenous thrombolysis with recombinant tissue type plasminogen activator; ASPECTS, Alberta Stroke Program Early CT Score.

\* p<0.05; \*\* p<0.01; \*\*\* p<0.001

<sup>†</sup>ASPECTS was used for patients with suspected anterior circulation stroke, and posterior circulation ASPECTS was used for patients with suspected posterior circulation stroke

**Supplemental Table 2.** Multivariable analyses between patient characteristics and imaging findings, and poor clinical outcome, within derivation set (n=824)

| <b>Predictor</b>                                  | <b>Patient characteristics and NCCIT</b> |                        |  | <b>Addition of CTA</b> |                       |  | <b>Addition of CTP</b> |                       |  | <b>Addition of CTA and CTP</b> |                       |  |
|---------------------------------------------------|------------------------------------------|------------------------|--|------------------------|-----------------------|--|------------------------|-----------------------|--|--------------------------------|-----------------------|--|
|                                                   | Coefficient                              | OR (95% CI)            |  | Coefficient            | OR (95% CI)           |  | Coefficient            | OR (95% CI)           |  | Coefficient                    | OR (95% CI)           |  |
| Age (per decade)                                  | 0.368                                    | 1.44 (1.26-1.66)***    |  | 0.374                  | 1.45 (1.26-1.67)***   |  | 0.355                  | 1.43 (1.24-1.64)***   |  | 0.370                          | 1.45 (1.26-1.67)***   |  |
| Stroke severity (NIHSS)                           |                                          |                        |  |                        |                       |  |                        |                       |  |                                |                       |  |
| NIHSS 1-2                                         | 0.000 (ref)                              | 1.00 (ref)             |  | 0.000 (ref)            | 1.00 (ref)            |  | 0.000 (ref)            | 1.00 (ref)            |  | 0.000 (ref)                    | 1.00 (ref)            |  |
| NIHSS 3-4                                         | 1.371                                    | 3.94 (1.70-9.14)**     |  | 1.122                  | 3.07 (1.43-6.61)**    |  | 1.140                  | 3.13 (1.47-6.67)**    |  | 1.134                          | 3.11 (1.44-6.70)**    |  |
| NIHSS 5-7                                         | 1.940                                    | 6.96 (3.06-15.79)***   |  | 1.653                  | 5.23 (2.48-10.99)***  |  | 1.640                  | 5.16 (2.47-10.76)***  |  | 1.630                          | 5.10 (2.42-10.76)***  |  |
| NIHSS 8-13                                        | 2.304                                    | 10.02 (4.40-22.83)***  |  | 1.956                  | 7.07 (3.33-14.99)***  |  | 1.883                  | 6.57 (3.12-13.85)***  |  | 1.892                          | 6.63 (3.11-14.14)***  |  |
| NIHSS >13                                         | 3.573                                    | 35.62 (15.13-83.86)*** |  | 2.998                  | 20.05 (9.07-44.29)*** |  | 2.931                  | 18.74 (8.46-41.52)*** |  | 2.860                          | 17.46 (7.76-39.25)*** |  |
| Time from symptom onset to scan (per hour)        | 0.073                                    | 1.08 (0.97-1.19)       |  | 0.045                  | 1.05 (0.95-1.16)      |  | 0.072                  | 1.07 (0.97-1.19)      |  | 0.053                          | 1.05 (0.95-1.17)      |  |
| Pre-admission mRS >2                              | 2.674                                    | 14.50 (5.82-36.11)***  |  | 2.492                  | 12.09 (5.32-27.47)*** |  | 2.472                  | 11.85 (5.24-26.77)*** |  | 2.514                          | 12.35 (5.44-28.05)*** |  |
| Admission glucose level (per mmol/L)              | 0.116                                    | 1.12 (1.04-1.22)**     |  | 0.117                  | 1.12 (1.04-1.22)**    |  | 0.116                  | 1.12 (1.04-1.22)**    |  | 0.118                          | 1.13 (1.04-1.22)**    |  |
| IV-rtPA, IAT or MT                                | -0.321                                   | 0.73 (0.45-1.17)       |  | -0.426                 | 0.65 (0.41-1.05)      |  | -0.281                 | 0.75 (0.48-1.20)      |  | -0.387                         | 0.68 (0.42-1.09)      |  |
| <b>Non-contrast CT predictors</b>                 |                                          |                        |  |                        |                       |  |                        |                       |  |                                |                       |  |
| Hyperdense vessel sign                            | 0.601                                    | 1.82 (1.18-2.83)**     |  | 0.196                  | 1.22 (0.75-1.96)      |  | 0.371                  | 1.45 (0.91-2.32)      |  | 0.103                          | 1.11 (0.67-1.83)      |  |
| ASPECTS ≤7 <sup>†</sup>                           | 0.868                                    | 2.38 (1.33-4.27)**     |  | 0.757                  | 2.13 (1.12-4.06)*     |  | 0.609                  | 1.84 (1.02-3.31)*     |  | 0.670                          | 1.95 (1.02-3.74)*     |  |
| <b>CT angiography predictors</b>                  |                                          |                        |  |                        |                       |  |                        |                       |  |                                |                       |  |
| CTA-SI ASPECTS ≤7 <sup>†</sup>                    |                                          |                        |  | -0.315                 | 0.73 (0.42-1.28)      |  |                        |                       |  | -0.500                         | 0.61 (0.34-1.10)      |  |
| Proximal intracranial occlusion                   |                                          |                        |  | 0.651                  | 1.92 (1.19-3.09)**    |  |                        |                       |  | 0.589                          | 1.80 (1.10-2.97)*     |  |
| Poor leptomeningeal collaterals                   |                                          |                        |  | 0.617                  | 1.85 (1.08-3.18)*     |  |                        |                       |  | 0.503                          | 1.65 (0.95-2.88)      |  |
| Significant carotid or vertebralbasilar stenosis  |                                          |                        |  | 0.804                  | 2.23 (1.42-3.51)**    |  |                        |                       |  | 0.836                          | 2.31 (1.46-3.64)***   |  |
| <b>CT perfusion predictors</b>                    |                                          |                        |  |                        |                       |  |                        |                       |  |                                |                       |  |
| CBV ASPECTS ≤7 <sup>†</sup>                       |                                          |                        |  |                        |                       |  | 0.379                  | 1.46 (0.81-2.63)      |  | 0.436                          | 1.55 (0.84-2.86)      |  |
| MTT ASPECTS ≤7 <sup>†</sup>                       |                                          |                        |  |                        |                       |  | 0.176                  | 1.19 (0.73-1.95)      |  | -0.082                         | 0.92 (0.55-1.55)      |  |
| Penumbra size (per SD; 18.2 cm <sup>2</sup> )     |                                          |                        |  |                        |                       |  |                        |                       |  |                                |                       |  |
| Infarct core size (per SD; 13.9 cm <sup>2</sup> ) |                                          |                        |  |                        |                       |  |                        |                       |  |                                |                       |  |
| Penumbra/infarct core index (per SD; 37.8%)       |                                          |                        |  |                        |                       |  | 0.125                  | 1.13 (0.90-1.43)      |  | 0.116                          | 1.12 (0.87-1.44)      |  |

Abbreviations: OR, odds ratio; CI, confidence interval; NIHSS, National Institutes of Health Stroke Scale; mRS, modified Rankin Scale; IV-rtPA, intravenous thrombolysis with recombinant tissue type plasminogen activator; IAT, intra-arterial thrombolysis; MT, mechanical thrombectomy; ASPECTS, Alberta Stroke Program Early CT Score; CTA-SI, CT angiography source images; CBV, cerebral blood volume; MTT, mean transit time.

\* p<0.05; \*\* p<0.01; \*\*\* p<0.001

<sup>†</sup>ASPECTS was used for patients with suspected anterior circulation stroke, and posterior circulation ASPECTS was used for patients with suspected posterior circulation stroke

**Supplemental Table 3.** Model performance

|                                                              | Patient characteristics and<br>NCCCT | Model with addition of CTA | Model with addition of CTP | Model with addition of CTA<br>and CTP |
|--------------------------------------------------------------|--------------------------------------|----------------------------|----------------------------|---------------------------------------|
| <b>Derivation set (n=824)</b>                                |                                      |                            |                            |                                       |
| R <sup>2</sup>                                               | 0.422                                | 0.445                      | 0.421                      | 0.451                                 |
| Brier score*                                                 | 0.153                                | 0.146                      | 0.151                      | 0.145                                 |
| AUC value                                                    | 0.837 (0.809-0.865)                  | 0.852 (0.825-0.878)        | 0.841 (0.813-0.868)        | 0.853 (0.826-0.880)                   |
| Goodness-of-fit p-value†                                     | 0.99                                 | 0.80                       | 0.69                       | 0.87                                  |
| <b>Internal validation (n=824)*</b>                          |                                      |                            |                            |                                       |
| R <sup>2</sup>                                               | 0.399                                | 0.425                      | 0.401                      | 0.423                                 |
| Brier score*                                                 | 0.159                                | 0.153                      | 0.158                      | 0.153                                 |
| AUC value                                                    | 0.828 (0.800-0.856)§                 | 0.839 (0.813-0.866)§       | 0.829 (0.801-0.856)§       | 0.839 (0.812-0.866)§                  |
| <b>Validation set (n=550)</b>                                |                                      |                            |                            |                                       |
| R <sup>2</sup>                                               | 0.302                                | 0.343                      | 0.310                      | 0.342                                 |
| Brier score*                                                 | 0.184                                | 0.175                      | 0.182                      | 0.175                                 |
| AUC value                                                    | 0.776 (0.735-0.817)                  | 0.793 (0.753-0.833)        | 0.777 (0.736-0.819)        | 0.793 (0.753-0.833)                   |
| Goodness-of-fit p-value†                                     | <0.001                               | <0.001                     | <0.001                     | <0.001                                |
| Goodness-of-fit p-value after updating intercept†            | 0.001                                | 0.09                       | 0.003                      | 0.01                                  |
| <b>AUC in subgroups of patients in the validation cohort</b> |                                      |                            |                            |                                       |
| Anterior circulation stroke (TACS or PACS; n=361)            | 0.778 (0.730-0.826)                  | 0.795 (0.749-0.842)        | 0.780 (0.732-0.828)        | 0.795 (0.749-0.841)                   |
| Posterior circulation stroke (POCS; n=80)                    | 0.748 (0.620-0.877)                  | 0.808 (0.695-0.921)        | 0.746 (0.618-0.874)        | 0.805 (0.690-0.920)                   |
| NIHSS ≥5 (n=315)                                             | 0.745 (0.692-0.799)                  | 0.778 (0.728-0.829)        | 0.747 (0.693-0.800)        | 0.779 (0.728-0.829)                   |
| NIHSS ≥8 (n=215)                                             | 0.742 (0.677-0.807)                  | 0.774 (0.713-0.836)        | 0.748 (0.684-0.812)        | 0.779 (0.718-0.840)                   |
| Pre-admission mRS 0-2 (n=515)                                | 0.749 (0.703-0.795)                  | 0.769 (0.724-0.813)        | 0.751 (0.705-0.796)        | 0.768 (0.723-0.812)                   |
| Treatment with IV-rtPA, IAT, or MT (n=343)                   | 0.750 (0.695-0.805)                  | 0.772 (0.718-0.825)        | 0.752 (0.698-0.807)        | 0.772 (0.719-0.825)                   |
| No treatment with IV-rtPA, IAT, or MT (n=207)                | 0.817 (0.755-0.878)                  | 0.828 (0.769-0.887)        | 0.818 (0.757-0.879)        | 0.826 (0.767-0.886)                   |
| Proximal intracranial occlusion (n=130)                      | 0.780 (0.702-0.859)                  | 0.811 (0.738-0.885)        | 0.792 (0.716-0.869)        | 0.815 (0.742-0.888)                   |

Abbreviations: NCCCT, non-contrast CT; CTA, CT angiography; CTP, CT perfusion; AUC, area under the curve; mRS, modified Rankin Scale; TACS, total anterior circulation syndrome; PACS, partial anterior circulation syndrome; POCS, posterior circulation syndrome; NIHSS, National Institutes of Health Stroke Scale; IV-rtPA, intravenous thrombolysis with recombinant tissue type plasminogen activator; IAT, intra-arterial thrombolysis; MT, mechanical thrombectomy.

\*Quadratic score for differences between actual outcomes and predictions, range from 0 for a perfect model to 0.25 for a non-informative model.

†Goodness-of-fit p-values are calculated with the Hosmer-Lemeshow test.

\*Internal validation with 1000 bootstraps resamples.

§Assuming the same standard error applies as estimated for model development.

**Supplemental Table 4.** Outcome prediction with patient characteristics and non-contrast CT (Excel file)

Please see the separate Excel file to use the interactive calculation sheet for prediction of clinical outcome with patient characteristics and non-contrast CT.

**Supplemental Table 5.** Outcome prediction with patient characteristics, non-contrast CT, CT angiography, and CT perfusion (Excel file)

Please see the separate Excel file to use the interactive calculation sheet for prediction of clinical outcome with patient characteristics, non-contrast CT, CT angiography, and CT perfusion.

## Supplemental Figure I. Calibration plots for all models in the validation set.

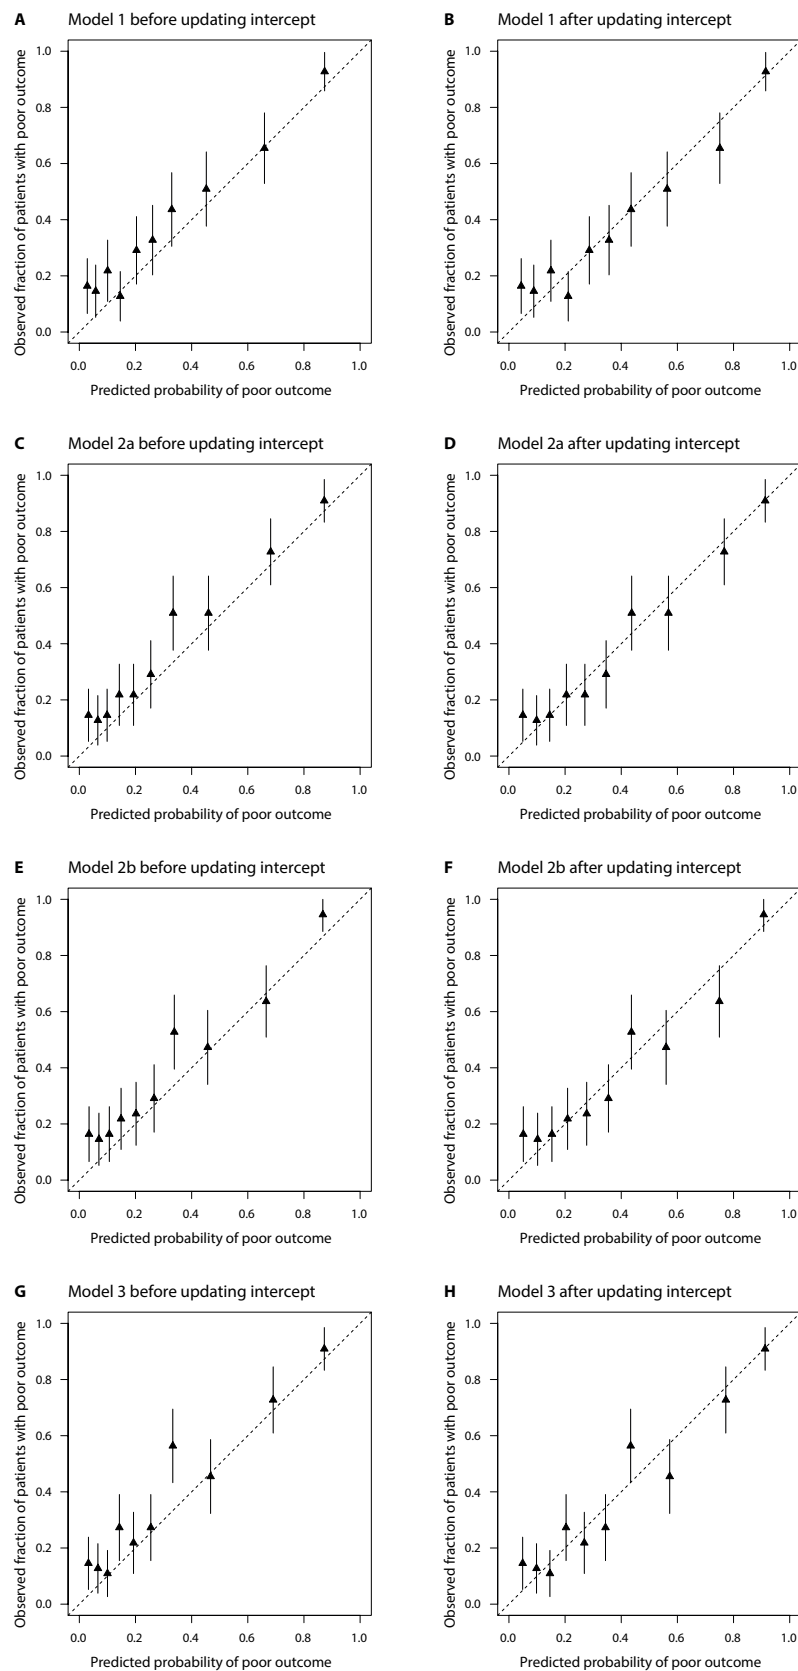

The calibration plots depict the observed fraction of patients with poor clinical outcome within deciles of predicted risk. Calibration plots are presented before (left) and after updating the model intercept (right), for the models based on patient characteristics and non-contrast CT (model 1; A, B), and with addition of CT angiography measures (model 2a; C, D), CT perfusion measures (model 2b; E, F), and both CT angiography and CT perfusion measures (model 3; G, H).

**Supplemental Figure 2.** Nomogram for prediction of the risk of poor clinical outcome (mRS 3-6), based on patient characteristics and non-contrast CT measures.

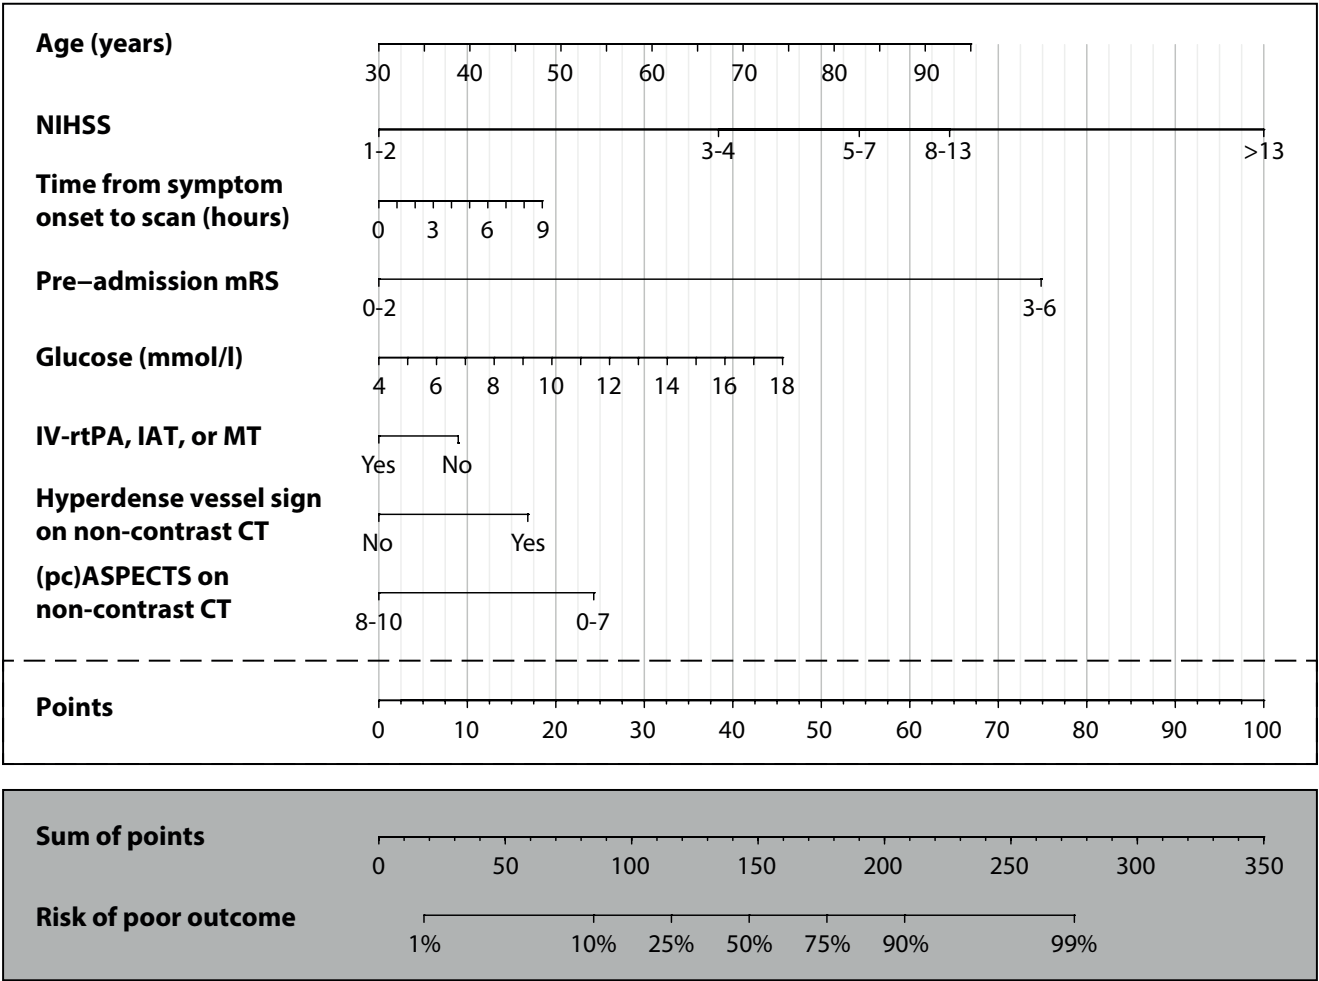

Determine the points for each predictor by locating the predictor value on its axis, and find the amount of points on the corresponding ‘Points’ axis. Add the points for the individual predictors together and locate this number on the ‘Sum of points’ axis to find the predicted risk of poor clinical outcome.

Abbreviations: NIHSS, National Institutes of Health Stroke Scale; mRS, modified Rankin Scale; IV-rtPA, intravenous thrombolysis with recombinant tissue type plasminogen activator; IAT, intra-arterial thrombolysis; MT, mechanical thrombectomy; (pc)ASPECTS, (posterior circulation) Alberta Stroke Program Early CT Score
